# Supplementary material for: Deep Learning for Fully Automated Prediction of Overall Survival in Patients with Oropharyngeal Cancer Using FDG-PET Imaging
Source: Oxford University Press journal article supplement (doi:10.1158/1078-0432.ccr-20-4935), 2021-05-04
Supplement: 10780432ccr204935-sup-257697_3_supp_7087296_qscj32.docx [file 10780432ccr204935-sup-257697_3_supp_7087296_qscj32.docx]

# Figure S5: Kaplan-Meier estimates of overall survival by the DeepPET-OPSCC risk category, evaluated in cTNM stages of the entire HPV+ cohort

**A HPV+ and cTNM I-III**

**
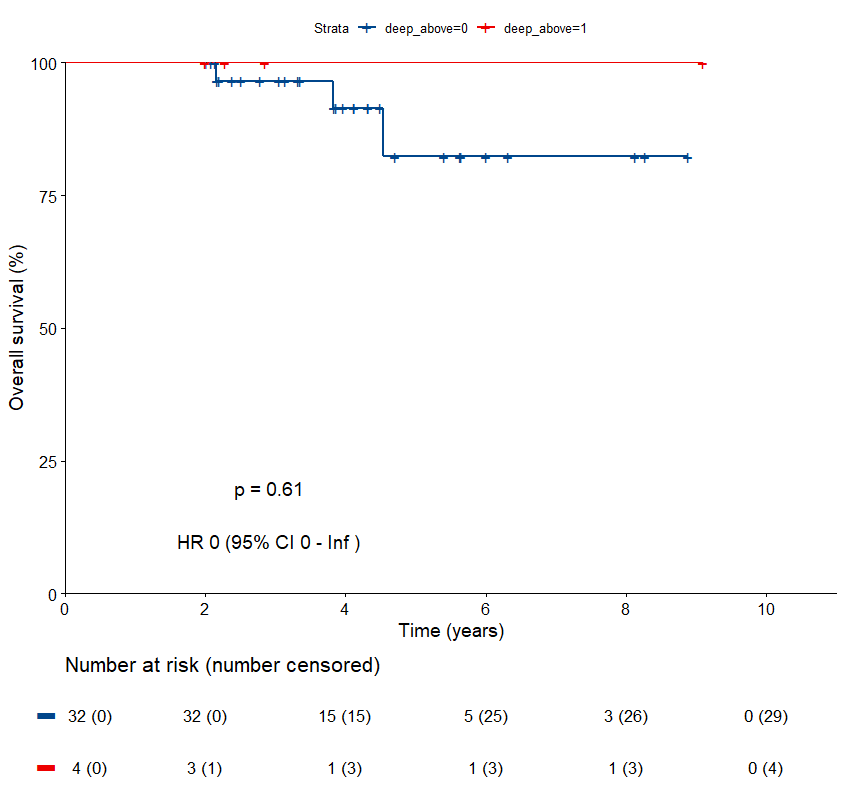
**

Low-risk group

High-risk group
