# Supplementary material for: Deep Learning for Fully Automated Prediction of Overall Survival in Patients with Oropharyngeal Cancer Using FDG-PET Imaging
Source: Oxford University Press journal article supplement (doi:10.1158/1078-0432.ccr-20-4935), 2021-05-04
Supplement: 10780432ccr204935-sup-257697_3_supp_7087301_qscj3k.docx [file 10780432ccr204935-sup-257697_3_supp_7087301_qscj3k.docx]

# Figure S10: Kaplan-Meier estimates of overall survival by the DeepPET-OPSCC risk category with three groups defined by tertiles of the risk scores in the discovery cohort


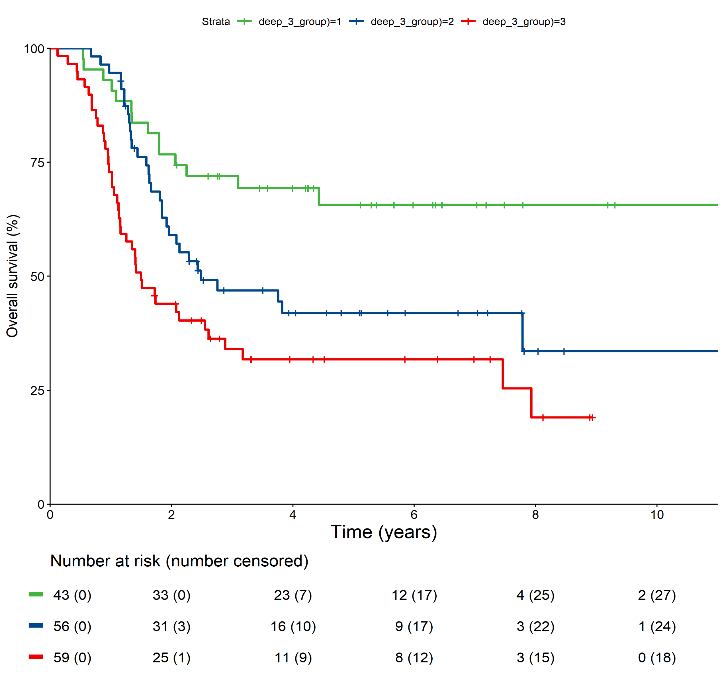

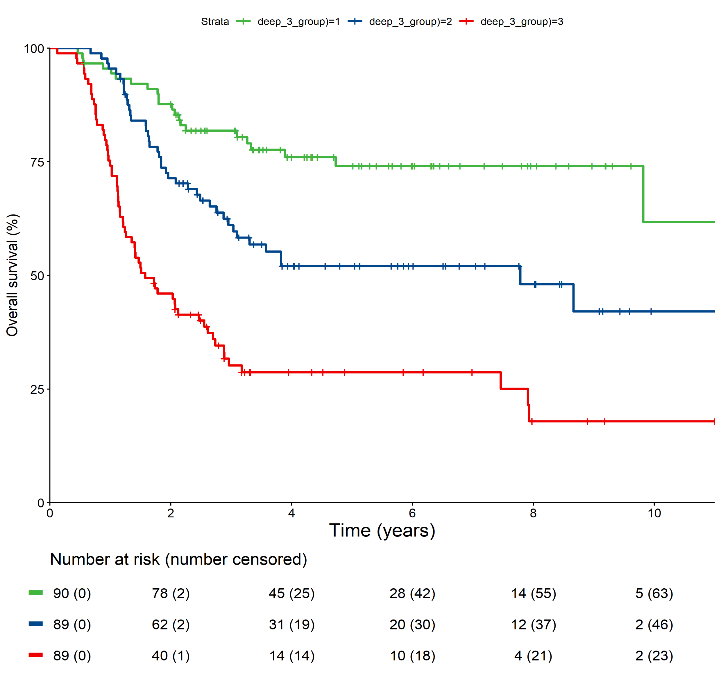


Low-risk group, ref

High-risk group, HR=5.07 (95% CI 3.11–8.26)

Medium-risk group, HR=2.15 (95% CI 1.28–3.62)

*P < 0.001*


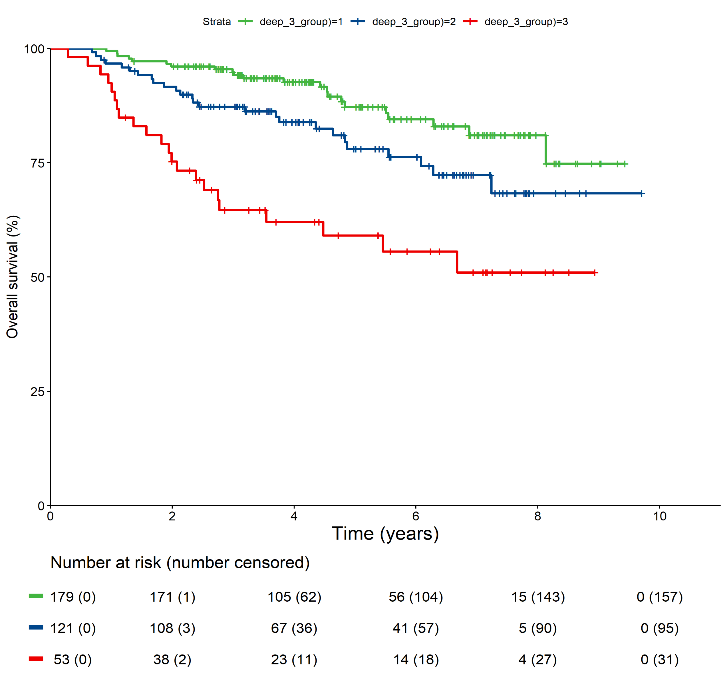


Low-risk group, ref

High-risk group, HR=4.16 (95% CI 2.30–7.51)

Medium-risk group, HR=1.84 (95% CI 1.04–3.25)

*P < 0.001*


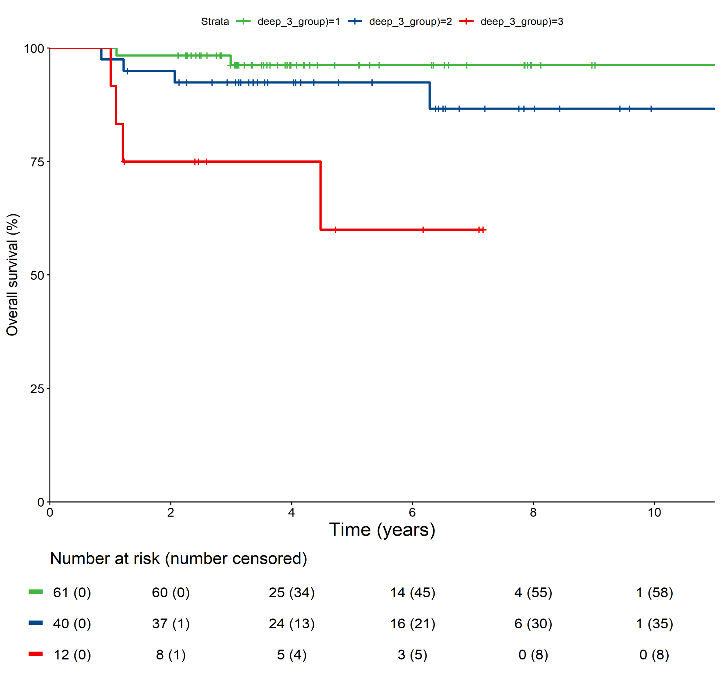


Low-risk group, ref

High-risk group, HR=12.08 (95% CI 2.20–66.31)

Medium-risk group, HR=2.80 (95% CI 0.51–15.37)

*P = 0.0016*

Low-risk group, ref

High-risk group, HR=3.30 (95% CI 1.80–6.08)

Medium-risk group, HR=1.99 (95% CI 1.06–3.76)

*P < 0.001*

**A Discovery cohort**

**B TCIA test cohort**

**C HPV+ and cTNM IVA in entire cohort**

**D HPV– and cTNM IVA in entire cohort**
