# Supplementary material for: Deep Learning for Fully Automated Prediction of Overall Survival in Patients with Oropharyngeal Cancer Using FDG-PET Imaging
Source: Oxford University Press journal article supplement (doi:10.1158/1078-0432.ccr-20-4935), 2021-05-04
Supplement: 10780432ccr204935-sup-257697_3_supp_7087305_qscj3q.docx [file 10780432ccr204935-sup-257697_3_supp_7087305_qscj3q.docx]

# Figure S14: Scatter plots of the relationship between SUVmax/MTV and DeepPET-OPSCC scores in the entire cohort with known HPV status (n=419).

**A Scatter plots of MTV and DeepPET-OPSCC scores B Scatter plots of SUVmax and DeepPET-OPSCC scores**

**
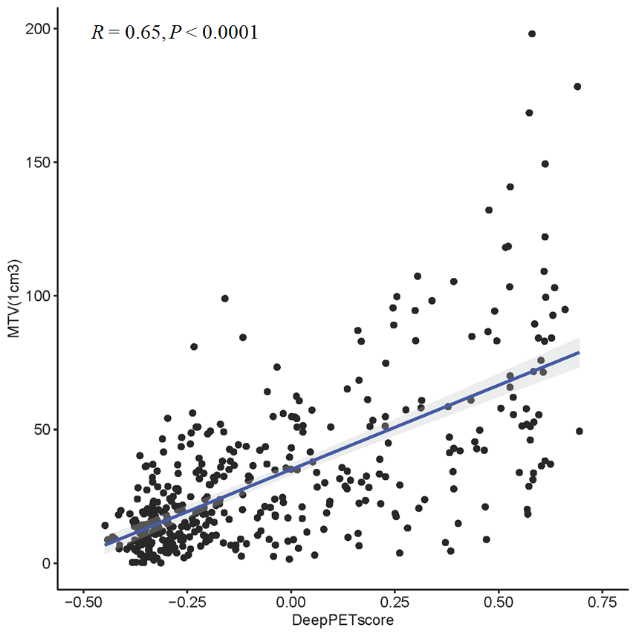

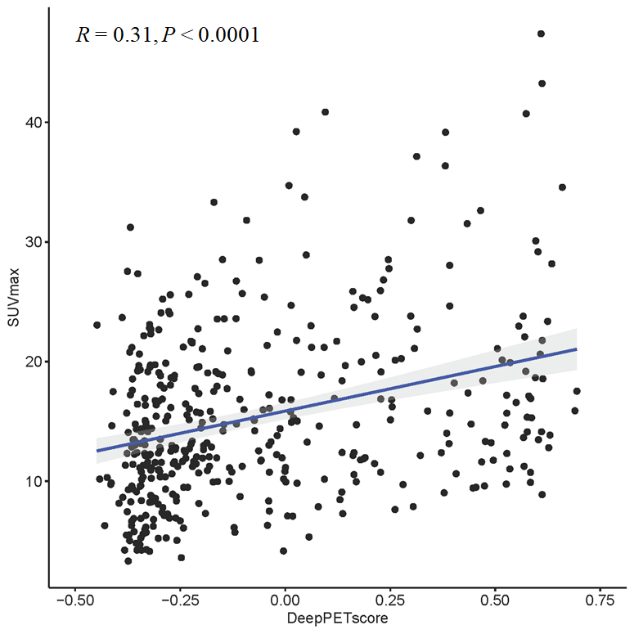
**

**C Scatter plots of SUVmax and MTV**

**
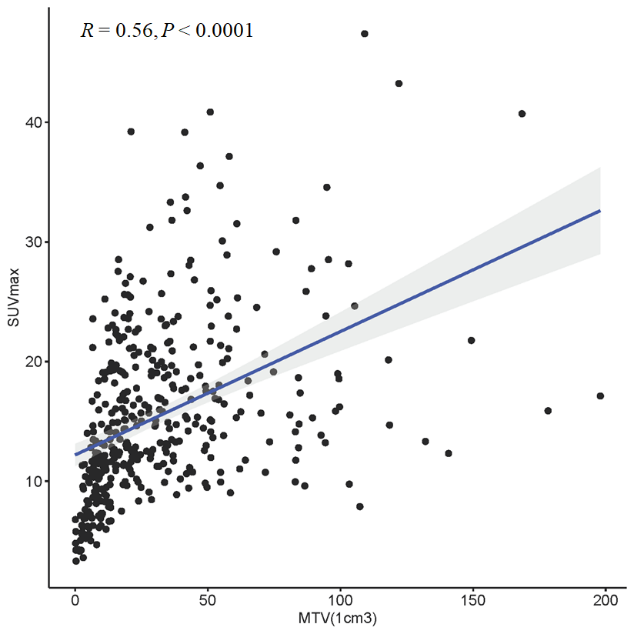
**
