# Supplementary material for: Deep Learning for Fully Automated Prediction of Overall Survival in Patients with Oropharyngeal Cancer Using FDG-PET Imaging
Source: Oxford University Press journal article supplement (doi:10.1158/1078-0432.ccr-20-4935), 2021-05-04
Supplement: 10780432ccr204935-sup-257697_3_supp_7087309_qscj3b.docx [file 10780432ccr204935-sup-257697_3_supp_7087309_qscj3b.docx]

# Figure S18: Time-dependent receiver operating characteristic (ROC) curves and AUCs of the DeepPET-OPSCC score, clinical Model, and an integrated nomogram that combines the DeepPET-OPSCC score and clinical factors (age, gender, cT, cN, and cTNM stages), to predict overall survival at 2 years evaluated on the clinical deployment test cohort


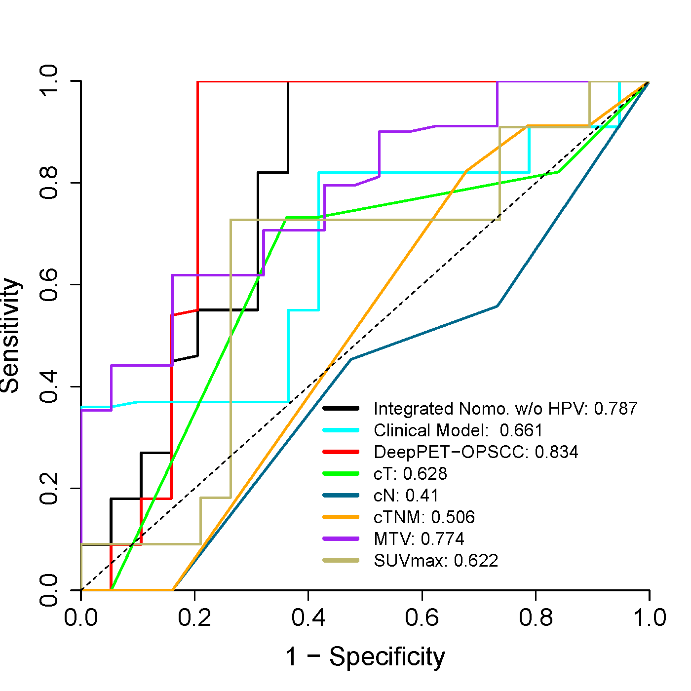


The follow-up times of this cohort is 2.3 (1.3–2.8) years and thus the endpoint of 5-year survival was not suitable for this cohort.
