# Supplementary material for: Deep Learning for Fully Automated Prediction of Overall Survival in Patients with Oropharyngeal Cancer Using FDG-PET Imaging
Source: Oxford University Press journal article supplement (doi:10.1158/1078-0432.ccr-20-4935), 2021-05-04
Supplement: 10780432ccr204935-sup-257697_3_supp_7087311_qscj3d.docx [file 10780432ccr204935-sup-257697_3_supp_7087311_qscj3d.docx]

# Figure S19: Examples of 3D PET images and corresponding heatmaps

**Figure S19A: Examples of 3D PET images (consecutive image slices), corresponding activation maps (heatmaps), and two enlarged images with heatmaps for better visual observation**

**Male, 61 years, HPV–, cT2-cN2-cM0, Stage: IVA; SUVmax: 18.39. Died at 14 months**

**DeepPET-OPSCC-T: 0.83**

**DeepPET-OPSCC-TN: 0.90**


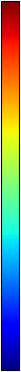


**Low-risk**

**High-risk**

Red curves: auto-segmented tumor boundaries; Green curves: auto-segmented lymph node boundaries. The PET images are anonymized by blocking the eye region with black boxes.

**Figure S19B: Additional examples of 3D PET images and corresponding heatmaps**

**Male, 49 years, HPV-, cT4a-cN2-cM0, Stage: IVA; SUV max 12.03 Alive at 133 months**

**DeepPET-OPSCC-T: 0.20**

**DeepPET-OPSCC-TN: 0.16**


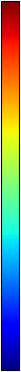


**Low-risk**

**High-risk**

Red curves: auto-segmented tumor boundaries; Green curves: auto-segmented lymph node boundaries. The PET images are anonymized by blocking the eye region with black boxes.

**Figure S19C: Additional examples of 3D PET images and corresponding heatmaps**

**Male, 56 years old, HPV+, cT3-cN2-cM0, Stage: IVA; SUVmax 12.21 Survived at 115 months**

**DeepPET-OPSCC-T: 0.38**

**DeepPET-OPSCC-TN: 0.11**


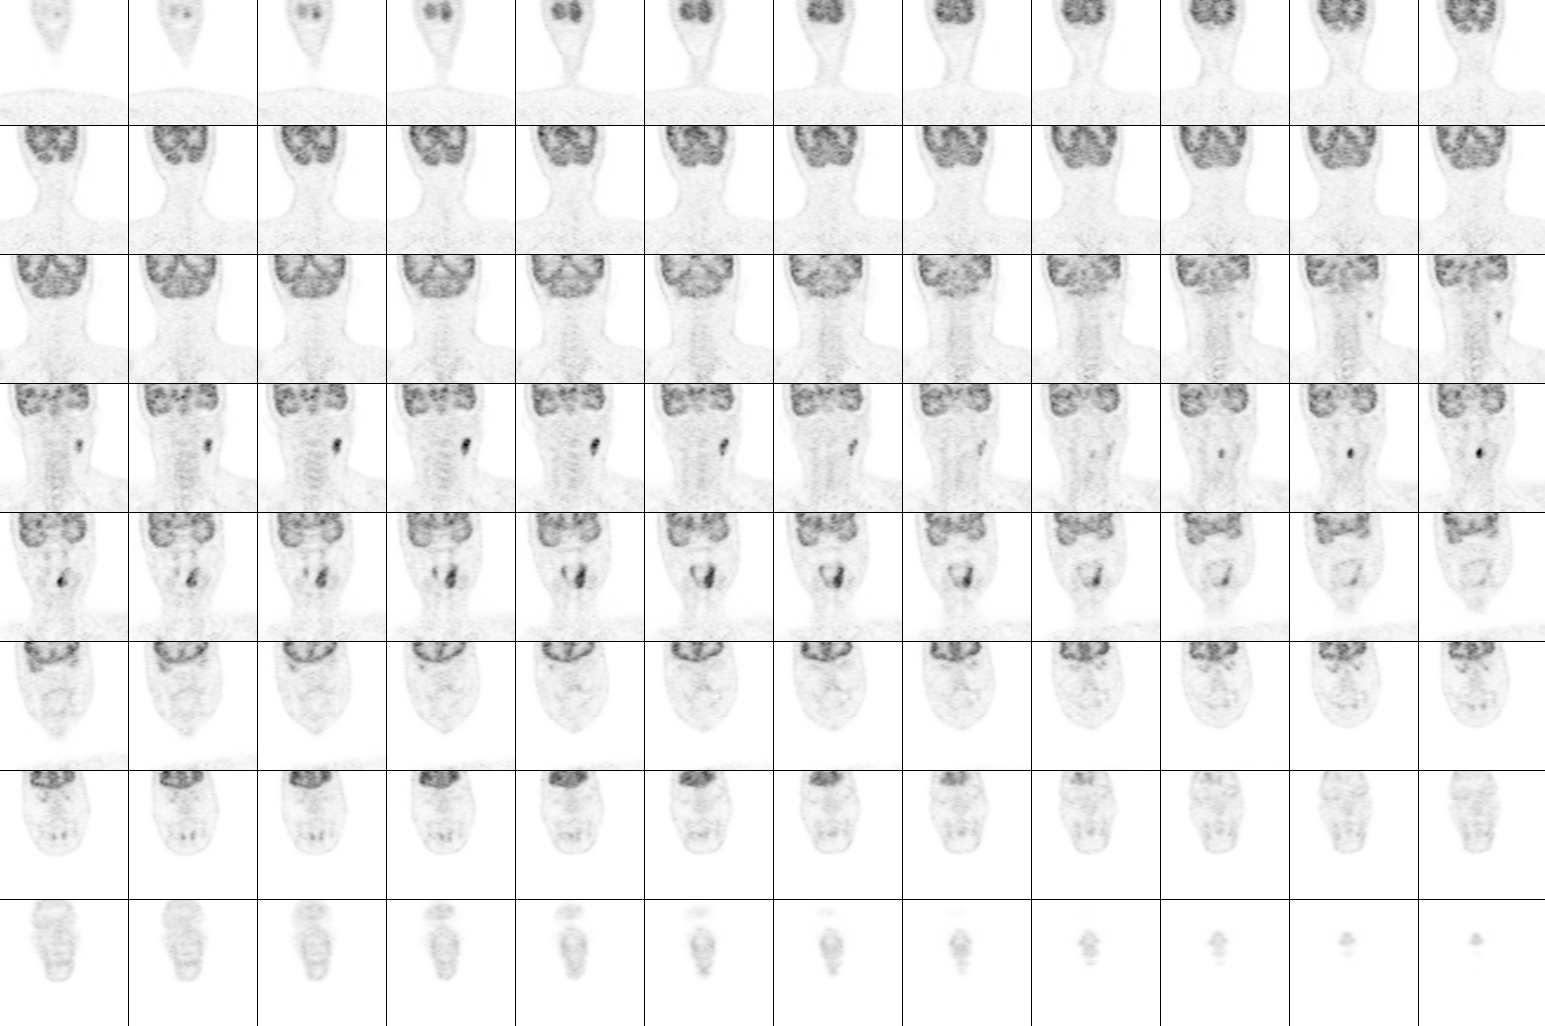

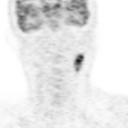

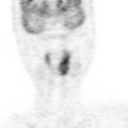

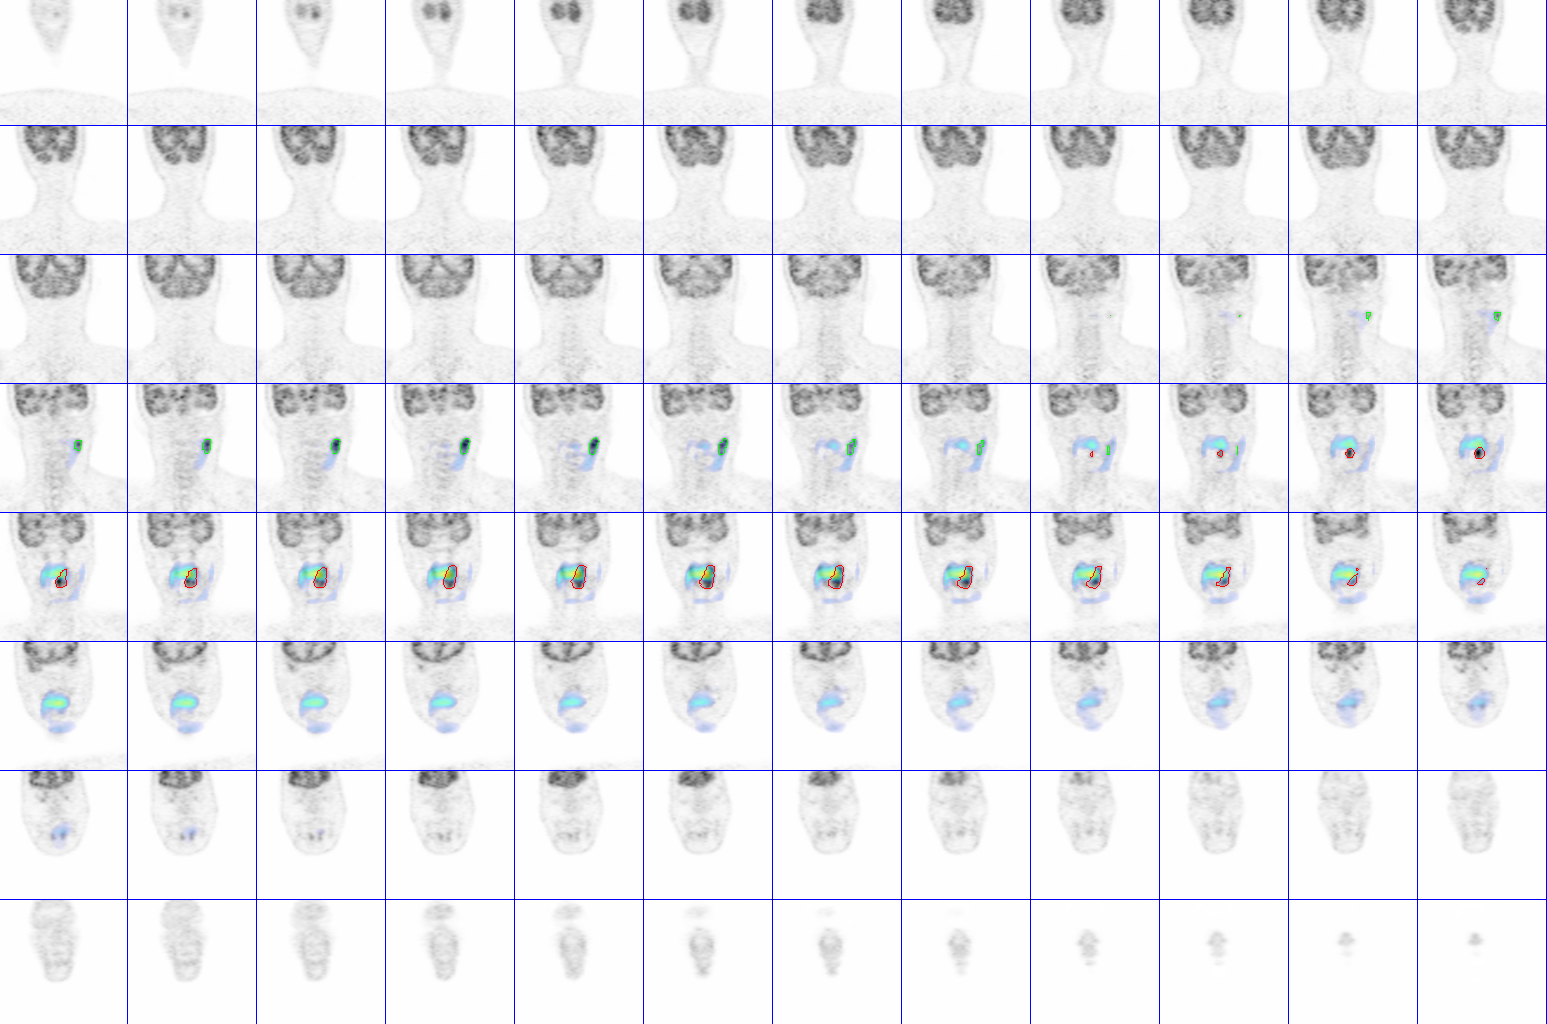

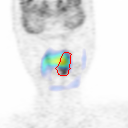

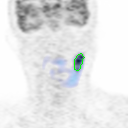

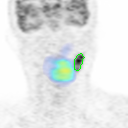

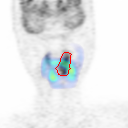

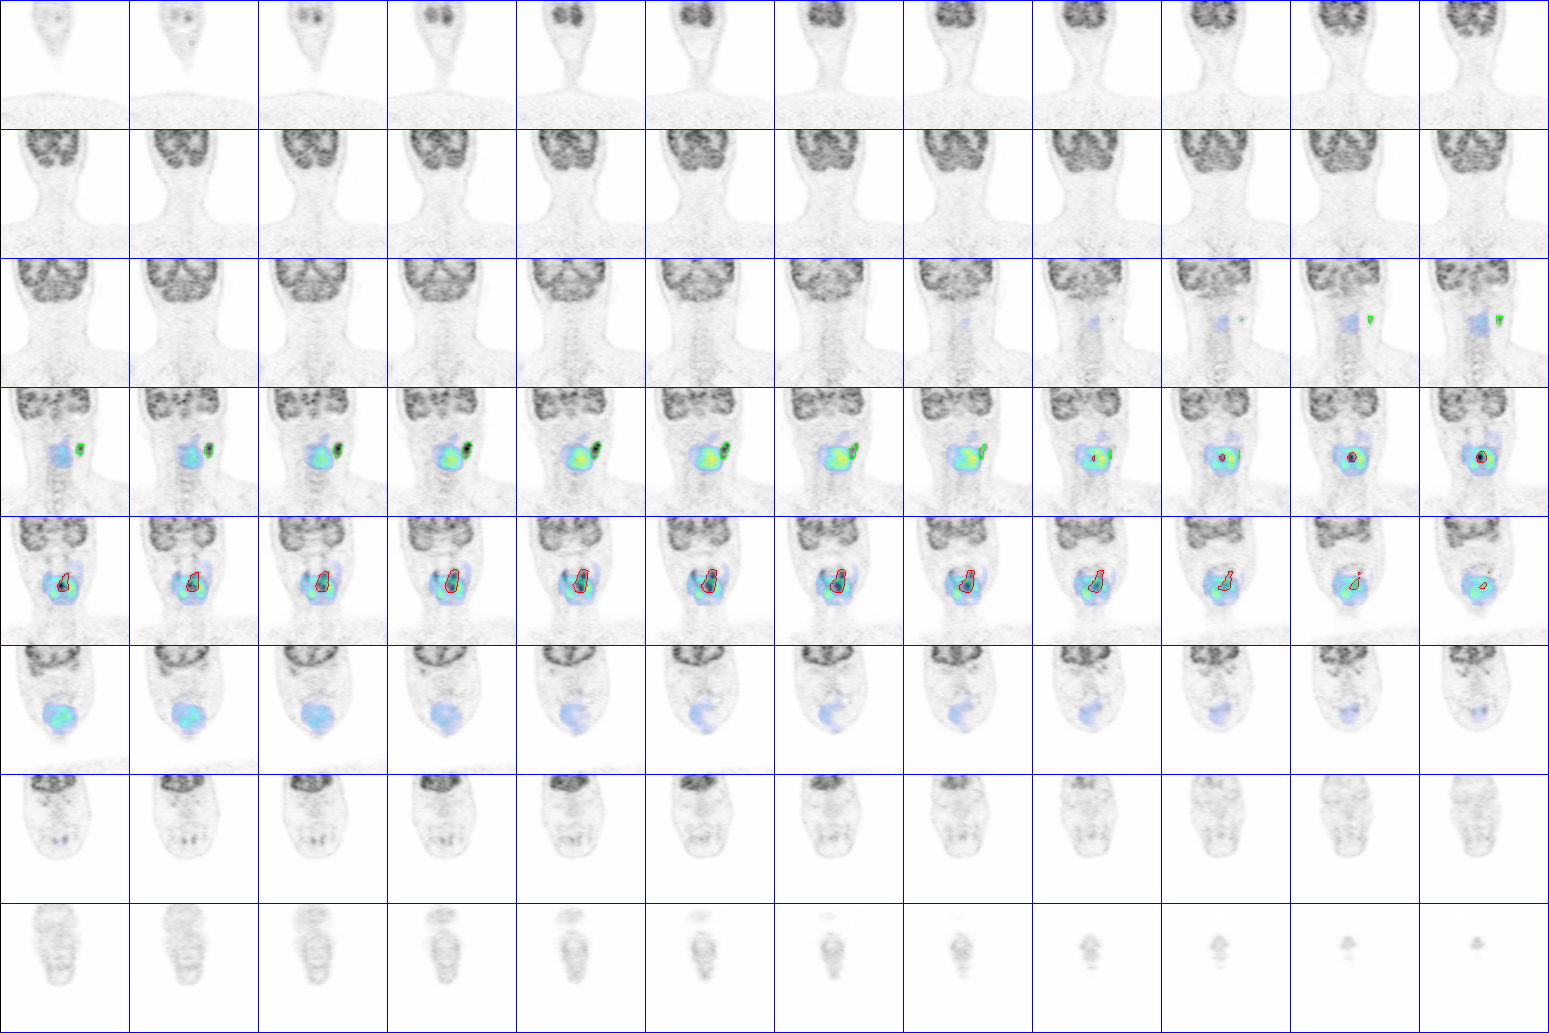

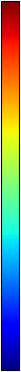


**Low-risk**

**High-risk**

Red curves: auto-segmented tumor boundaries; Green curves: auto-segmented lymph node boundaries. The PET images are anonymized by blocking the eye region with black boxes.

**Figure S19D: Additional examples of 3D PET images and corresponding heatmaps**

**Male, 51 years old, HPV+, cT4-cN2-cM0, Stage: IVA; SUVmax 14.38 Died at 15 months**

**DeepPET-OPSCC-T: 0.39**

**DeepPET-OPSCC-TN: 0.79**


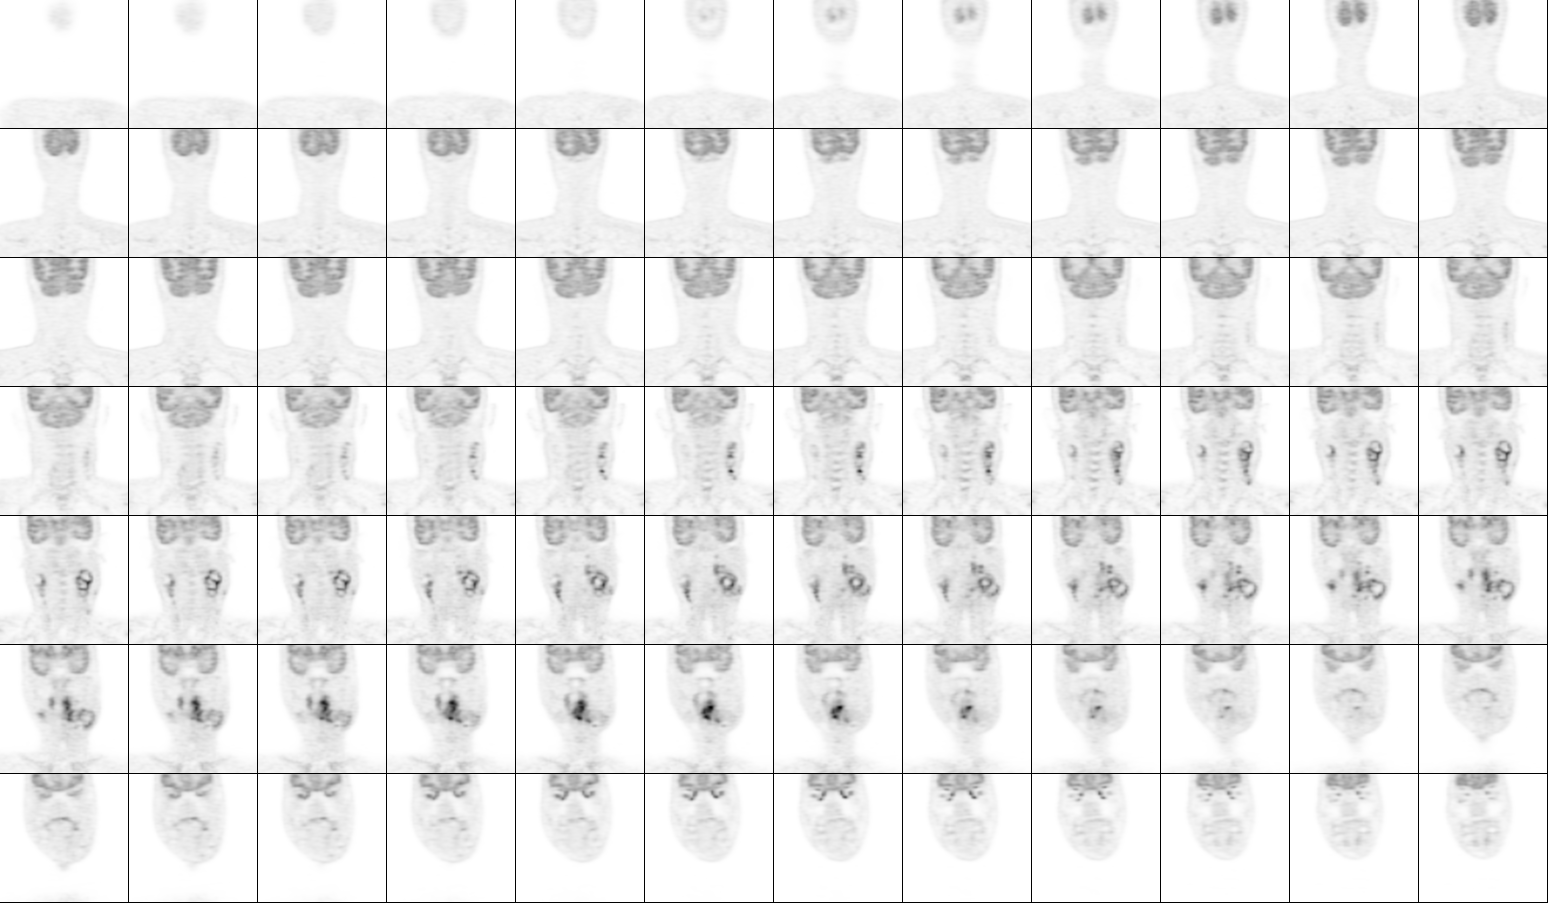

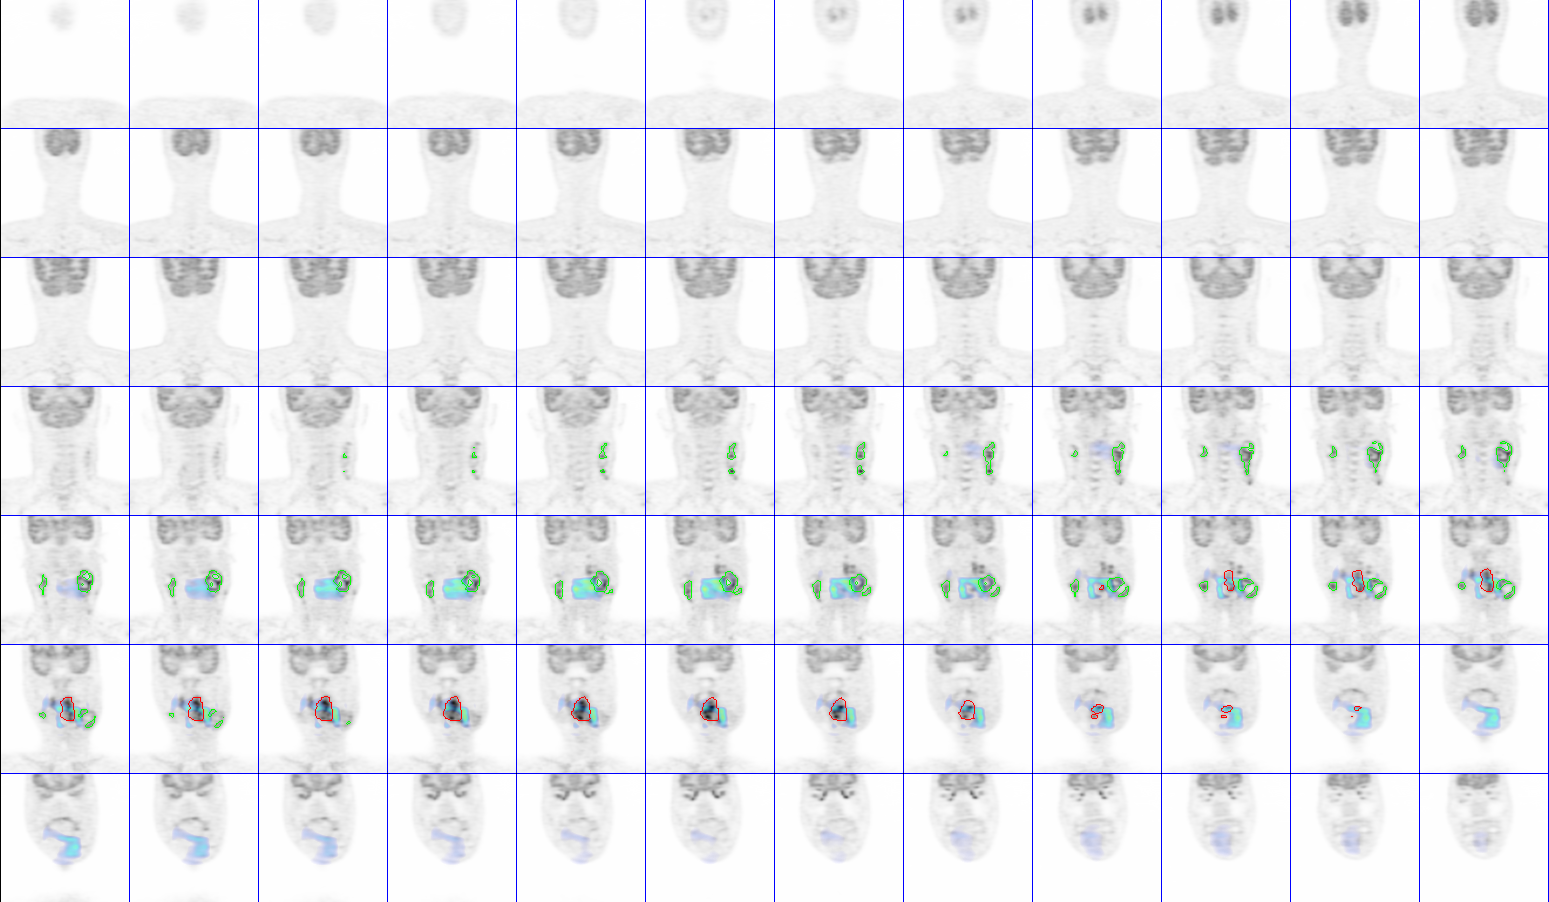

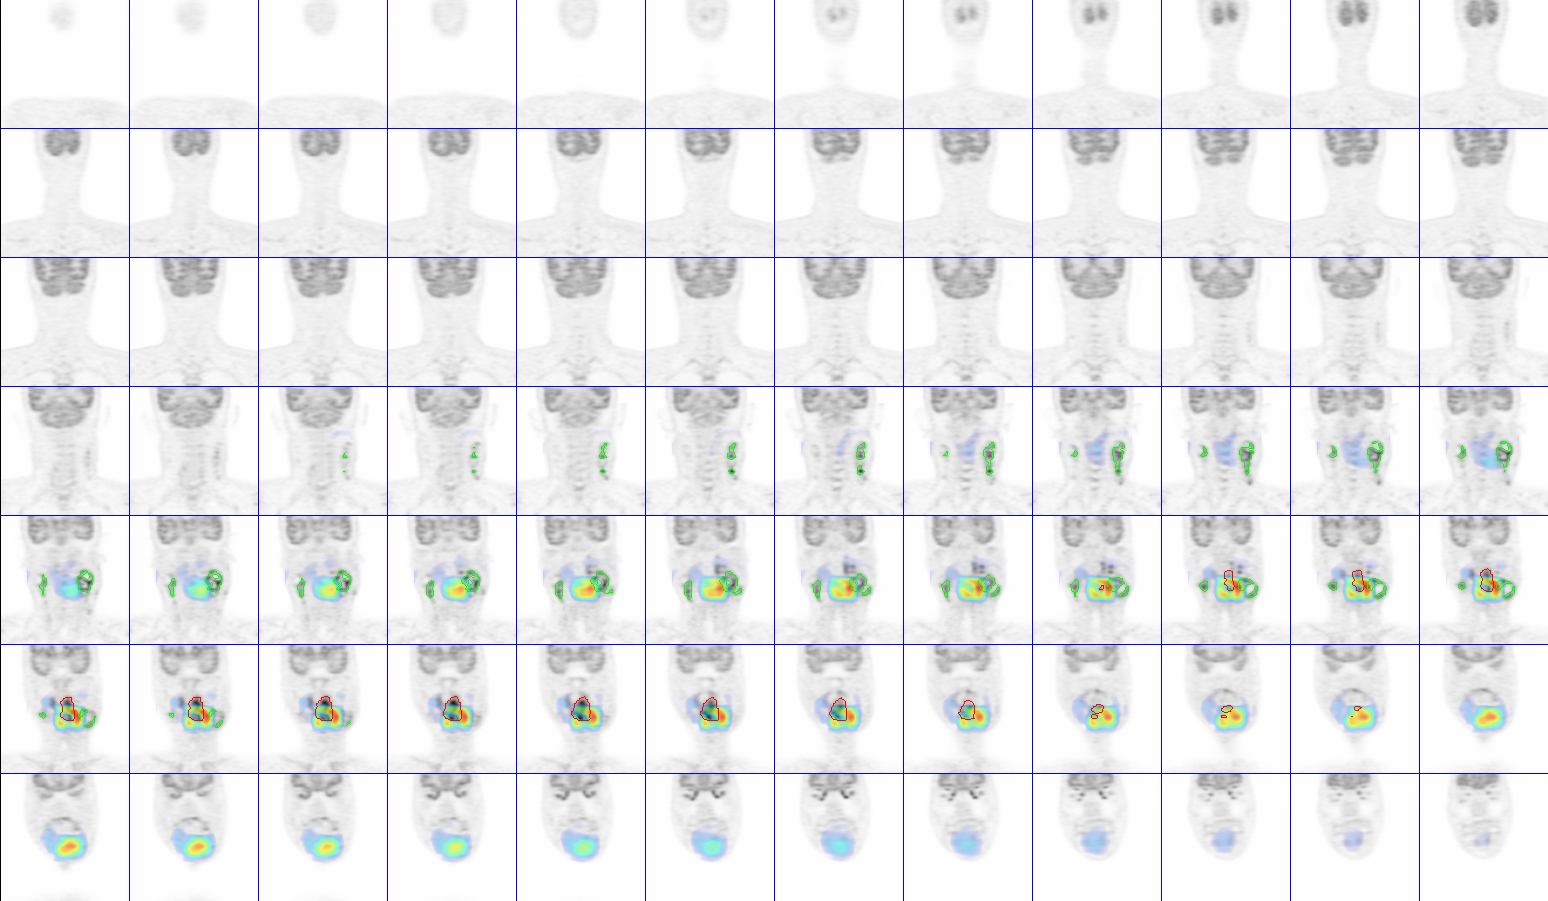

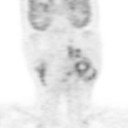

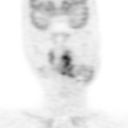

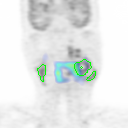

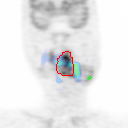

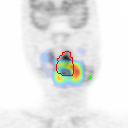

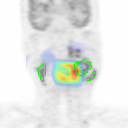

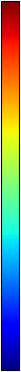


**Low-risk**

**High-risk**

Red curves: auto-segmented tumor boundaries; Green curves: auto-segmented lymph node boundaries. The PET images are anonymized by blocking the eye region with black boxes.
