# Supplementary material for: Deep Learning for Fully Automated Prediction of Overall Survival in Patients with Oropharyngeal Cancer Using FDG-PET Imaging
Source: Oxford University Press journal article supplement (doi:10.1158/1078-0432.ccr-20-4935), 2021-05-04
Supplement: 10780432ccr204935-sup-257697_3_supp_7087312_qscj3v.docx [file 10780432ccr204935-sup-257697_3_supp_7087312_qscj3v.docx]

# Figure S2: Kaplan-Meier estimates of overall survival by the DeepPET-OPSCC risk category, evaluated in the entire cohort with known HPV status

**A HPV+ B HPV–**

**
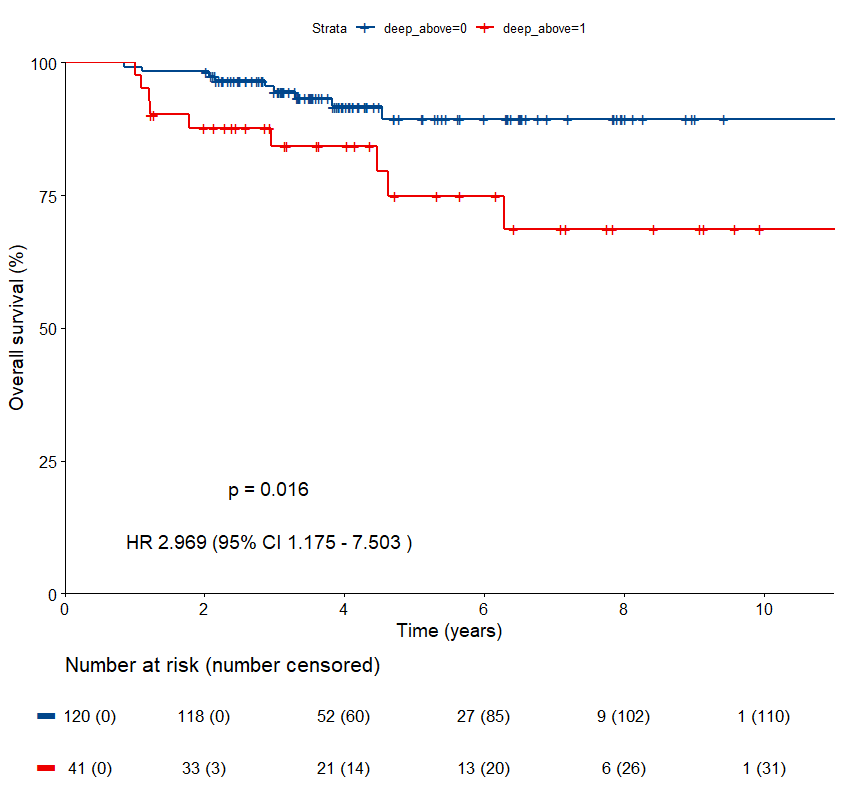

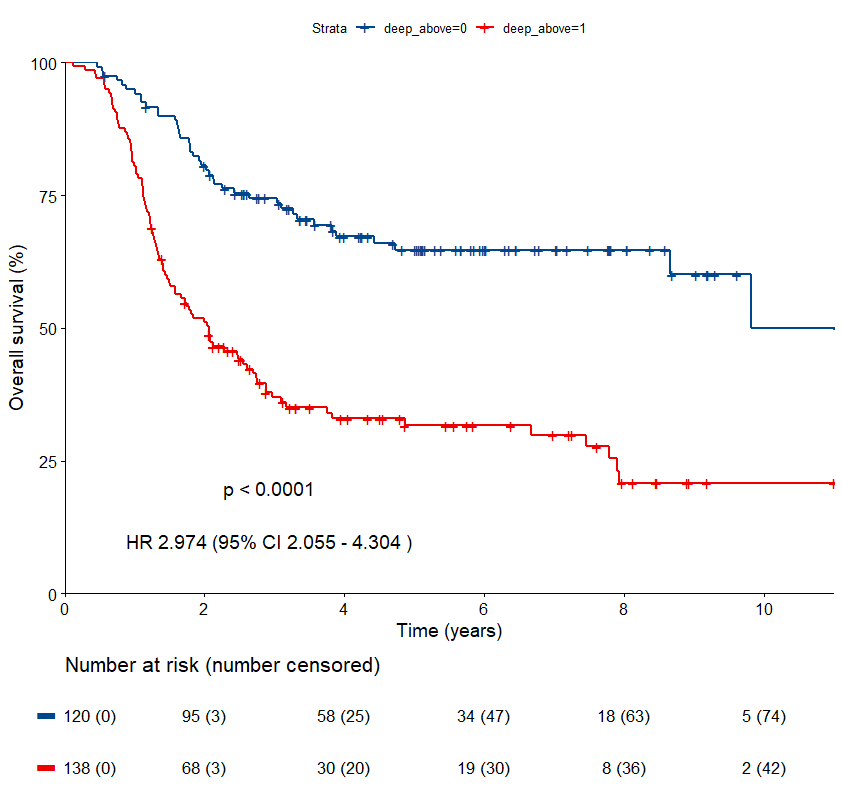
**

Low-risk group

High-risk group

High-risk group

Low-risk group
